# Supplementary material for: Leveraging Deep Learning Techniques and Integrated Omics Data for Tailored Treatment of Breast Cancer
Source: MDPI journal article supplement (doi:10.3390/jpm12050674), 2022-04-22
Supplement: s1 [file s1]

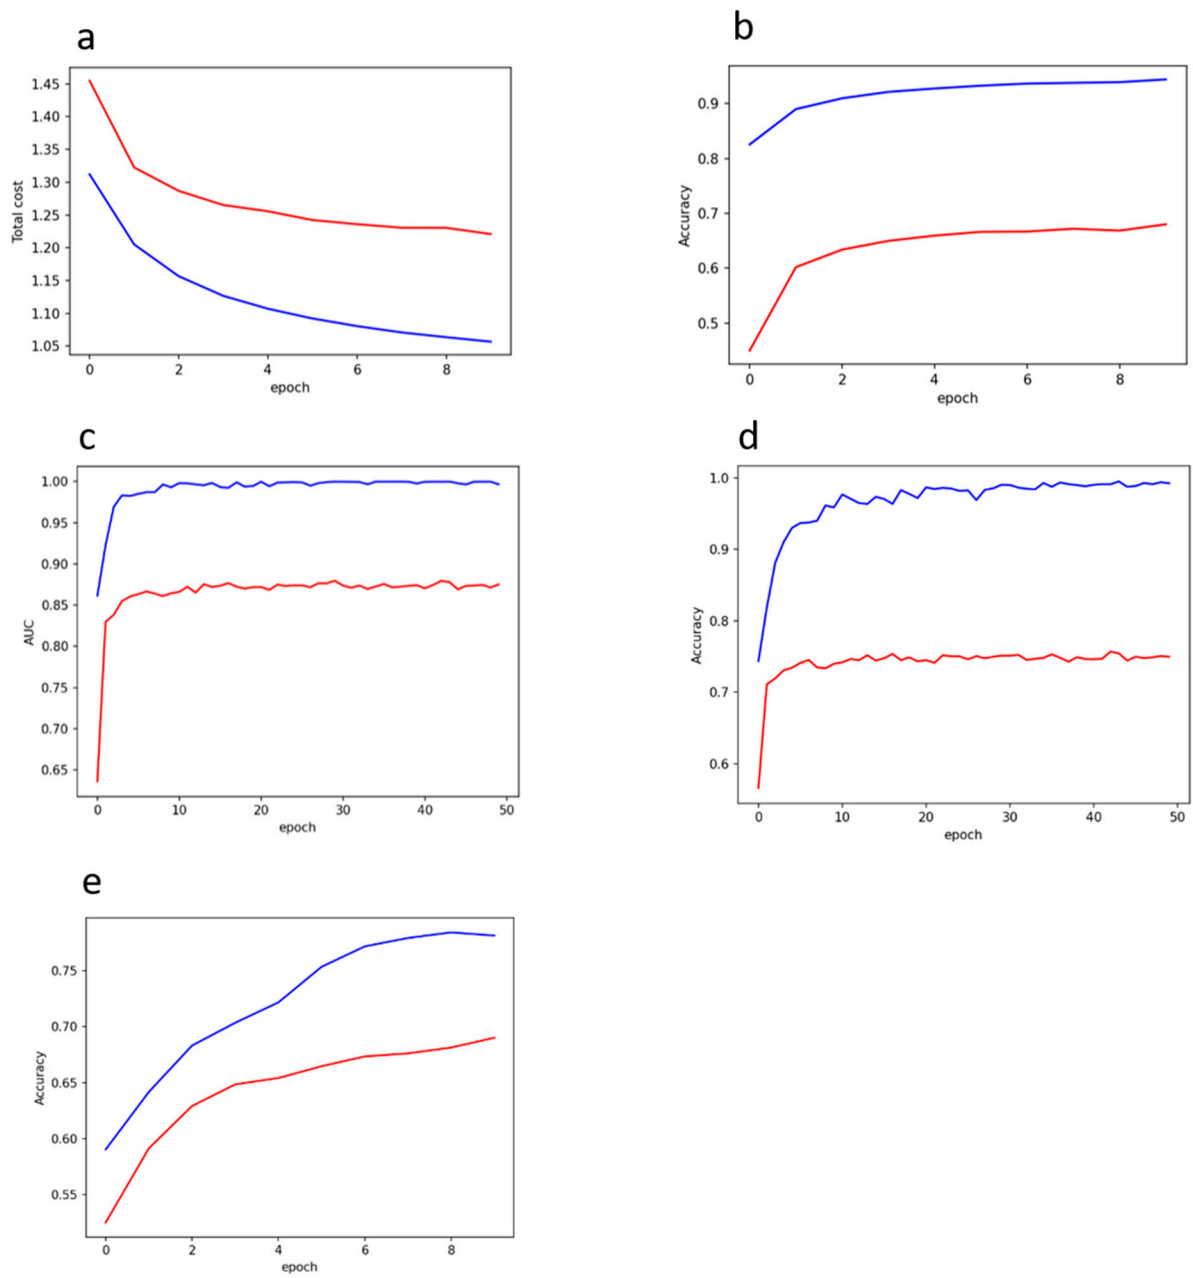

**Figure S1.** **a:** Cost of post proposed model using multiomics data and all subtypes. **b:** Accuracy of proposed mode using multiomics data and all subtypes. **c:** Accuracy of the proposed model Lum A vs Her2+ classification. **d:** Accuracy of the proposed model Lum A vs Basal-Like classification. **e** S1 **e:** Accuracy of the proposed model Lum A vs Lum B Classification. Both worst and best performances are depicted with cross validation.

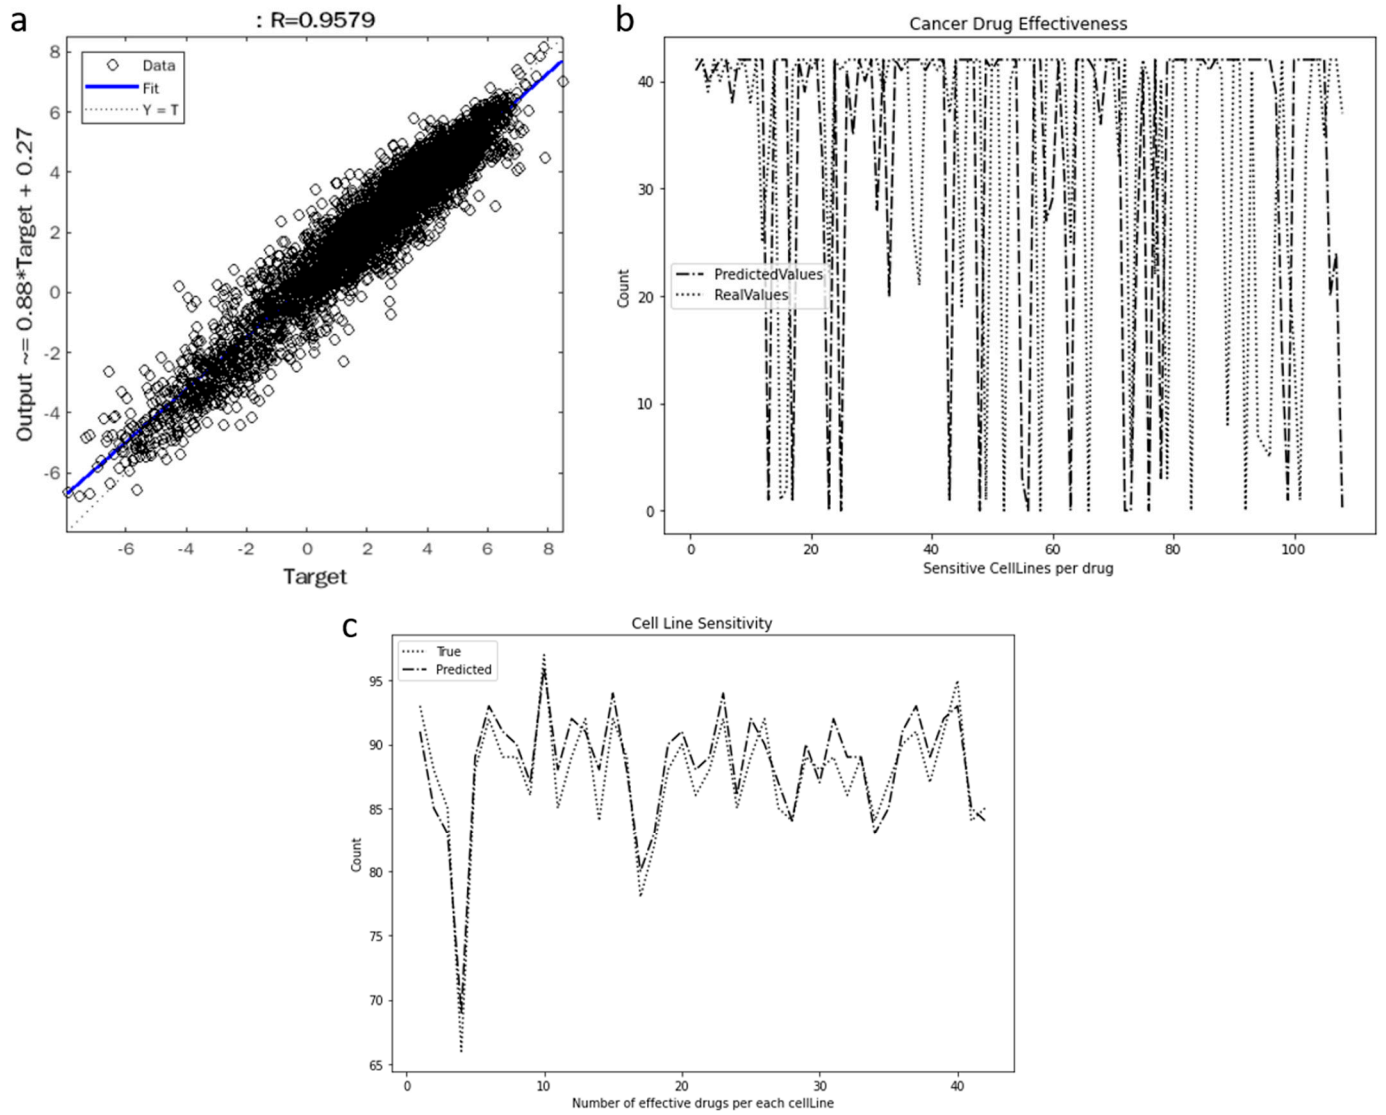

**Figure S2.** **a:** Regression values of all drugs combined. **b:** Effectiveness all drugs across all cell lines. **c:** Sensitivity of all cell-lines across all drugs.

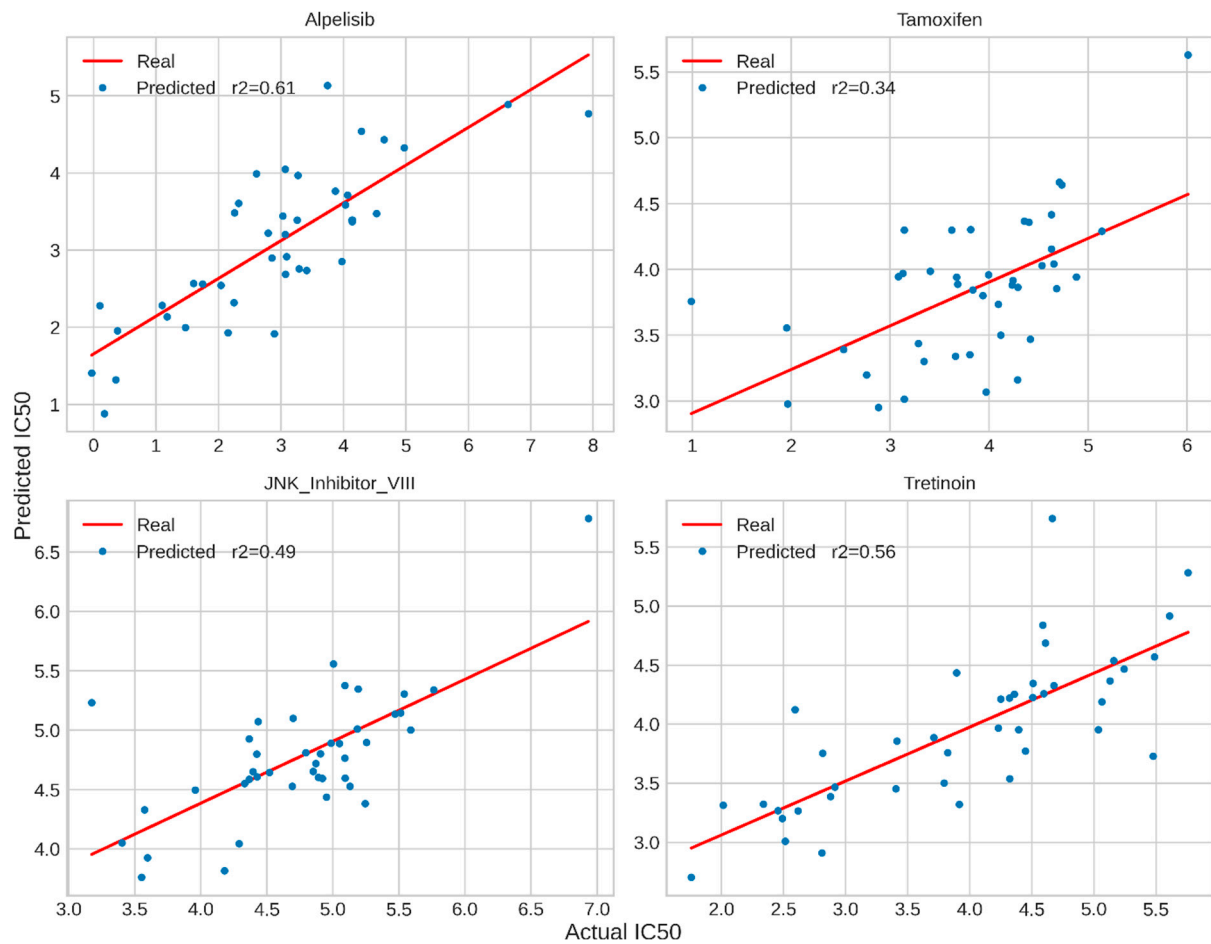

**Figure S3.** The subplots represent the  $r^2_{\text{squared}}$  error of the four cancer drugs. The low  $r^2_{\text{squared}}$  value of each drug is mainly due to outliers.

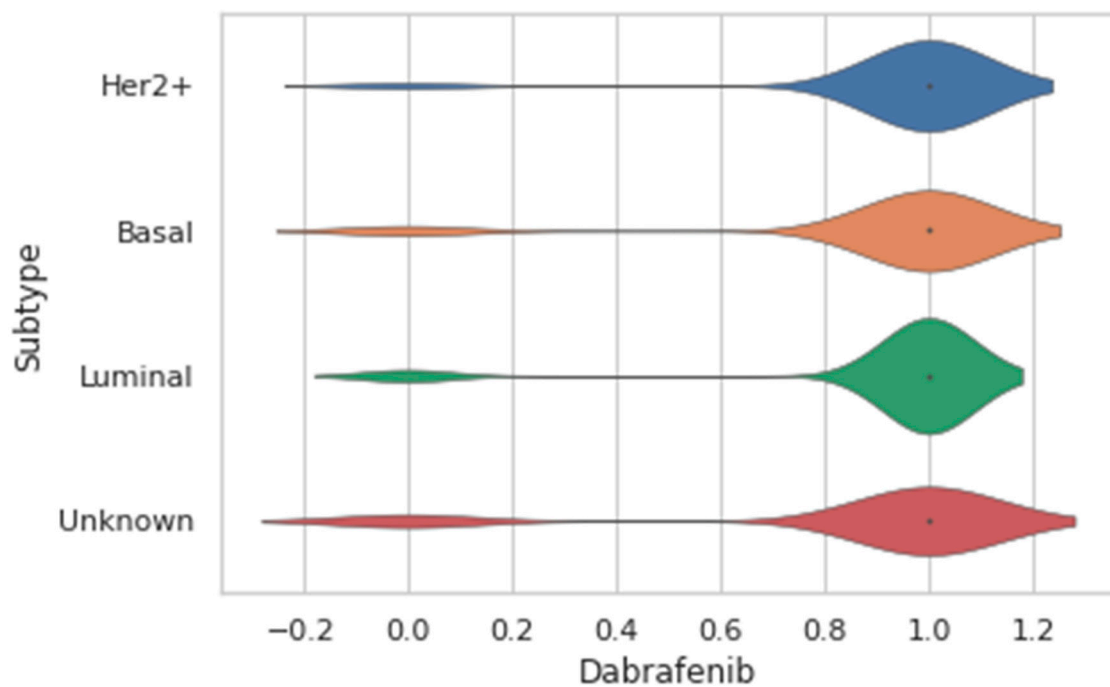

**Figure S4.** Sensitivity of different subtypes to Dabrafenib.

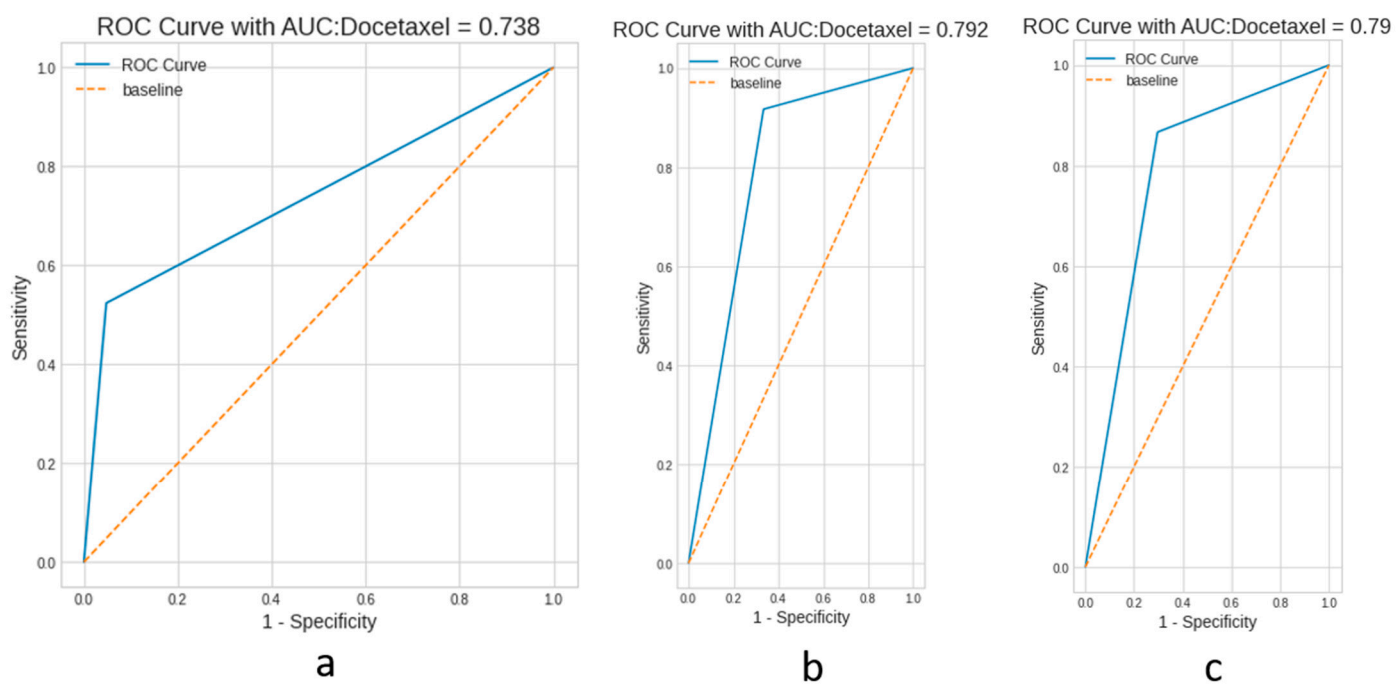

**Figure S5.** AUC for Docetaxel. **a:** SVM. **b:** Random Forest. **c:** DCNN-DR.

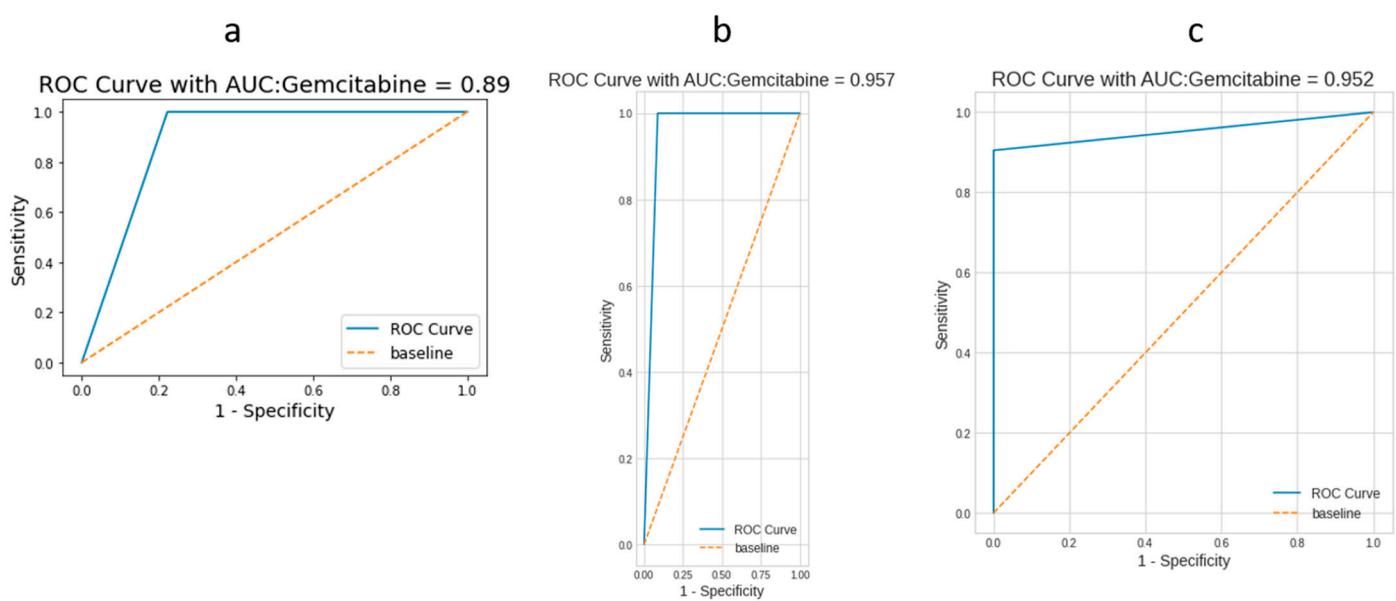

**Figure S6.** AUC for Gemcitabine. **a:** SVM. **b:** Random Forest. **c:** DCNN-DR.

**Table S1.** Performance measures of subtype model.

| Omics data used                       | fscore | Accuracy Avg | AUC score | Min Cost |
|---------------------------------------|--------|--------------|-----------|----------|
| Integrated data auto encoder accuracy | 0.96   | 0.94         | 0.988     | 0.96     |
| Single omics protein data all         | 0.4    | 0.488        | 0.68      | 1.41299  |
| Single omics Methylation Data         | 0.86   | 0.84         | 0.97      | 1.078    |
| Single Omics Clinical Data            | 0.54   | 0.52         | 0.75      | 1.39     |
| Single Omics RNA data                 | 0.9    | 0.93         | 0.97      | 0.97     |
| Single Omics mirna                    | 0.88   | 0.91         | 0.975     | 1.004725 |

**Table S2.** Top ranked genes with their p-values after feature engineering.

| Features | P values               |
|----------|------------------------|
| TP53     | $5.08 \times 10^{-07}$ |
| CDH1     | $1.34 \times 10^{-04}$ |
| EGFR     | $1.84 \times 10^{-03}$ |
| ANKS4B   | $4.85 \times 10^{-03}$ |
| B3GAT1   | $6.30 \times 10^{-03}$ |
| ESR1     | $6.43 \times 10^{-03}$ |
| TMEM90A  | $6.88 \times 10^{-03}$ |
| TRIP10   | $8.09 \times 10^{-03}$ |
| INPP4B   | $2.53 \times 10^{-02}$ |
| SNAP91   | $3.21 \times 10^{-02}$ |
| NDRG1    | $5.07 \times 10^{-02}$ |
| C1orf74  | $5.49 \times 10^{-02}$ |
| BCL2L14  | $7.11 \times 10^{-02}$ |
| DMRT2    | $1.13 \times 10^{-01}$ |
| CFH      | $1.13 \times 10^{-01}$ |
| EN2      | $1.49 \times 10^{-01}$ |
| PGR.1    | $1.61 \times 10^{-01}$ |
| PGR      | $1.61 \times 10^{-01}$ |

**Table S3.** PCC and MSE of all the drugs after regression.

| Drug number | Drugs         | MSE      | Pred values |
|-------------|---------------|----------|-------------|
| 10          | GSK2126458    | 0.374169 | 0.95        |
| 7           | Epothilone B  | 0.570993 | 0.93        |
| 11          | QL X 138      | 0.454059 | 0.91        |
| 14          | WZ3105        | 0.558485 | 0.91        |
| 19          | PI 103        | 0.693053 | 0.91        |
| 30          | KIN001 102    | 0.422952 | 0.91        |
| 29          | OSI 027       | 0.849233 | 0.91        |
| 59          | Gemcitabine   | 1.620999 | 0.9         |
| 64          | Bleomycin     | 1.824436 | 0.9         |
| 51          | NPK76 II 72 1 | 0.491407 | 0.9         |
| 85          | AUY922        | 0.725835 | 0.9         |
| 43          | XL 880        | 0.632381 | 0.9         |
| 94          | GSK690693     | 0.808683 | 0.89        |
| 46          | Docetaxel     | 0.649373 | 0.89        |
| 18          | SNX 2112      | 1.005965 | 0.89        |

|     |                   |          |      |
|-----|-------------------|----------|------|
| 13  | Mitomycin C       | 0.500532 | 0.89 |
| 66  | Thapsigargin      | 1.261452 | 0.89 |
| 35  | PIK 93            | 0.45573  | 0.89 |
| 15  | CP724714          | 0.727675 | 0.88 |
| 58  | FK866             | 1.869812 | 0.88 |
| 95  | PXD101 Belinostat | 0.701246 | 0.88 |
| 63  | TPCA 1            | 0.428334 | 0.87 |
| 69  | BMS 345541        | 0.263834 | 0.87 |
| 38  | BX 795            | 0.436934 | 0.87 |
| 67  | AZD7762           | 0.702587 | 0.87 |
| 42  | CAY10603          | 0.289302 | 0.87 |
| 17  | Tipifarnib        | 0.531419 | 0.87 |
| 55  | Afatinib rescreen | 1.047942 | 0.87 |
| 26  | SB 715992         | 0.853994 | 0.86 |
| 83  | PHA 793887        | 0.737185 | 0.86 |
| 36  | JW 7 24 1         | 0.407229 | 0.86 |
| 31  | I BET             | 0.553701 | 0.86 |
| 45  | CUDC 101          | 0.841821 | 0.86 |
| 88  | ZSTK474           | 0.632063 | 0.86 |
| 34  | HG 6 64 1         | 0.710582 | 0.85 |
| 41  | CX 5461           | 0.759924 | 0.85 |
| 75  | UNC1215           | 0.097396 | 0.85 |
| 39  | STF 62247         | 0.281229 | 0.85 |
| 68  | Genentech Cpd 10  | 0.813469 | 0.84 |
| 20  | LAQ824            | 0.642524 | 0.84 |
| 93  | KIN001 266        | 0.481196 | 0.84 |
| 24  | AS605240          | 0.882598 | 0.84 |
| 8   | PLX4720 rescreen  | 0.271887 | 0.84 |
| 23  | GSK429286A        | 0.234915 | 0.84 |
| 92  | YK 4 279          | 0.451187 | 0.84 |
| 84  | KIN001 244        | 0.293443 | 0.83 |
| 70  | Masitinib         | 0.410133 | 0.83 |
| 73  | Trametinib        | 1.464458 | 0.83 |
| 61  | JQ1 1             | 0.768938 | 0.83 |
| 91  | YM201636          | 0.394204 | 0.83 |
| 100 | Taselisib         | 1.444584 | 0.83 |
| 52  | RDEA119           | 0.771976 | 0.83 |
| 53  | XMD14 99          | 0.216104 | 0.82 |
| 6   | VX 11e            | 0.678445 | 0.82 |
| 28  | Ruxolitinib       | 0.154501 | 0.82 |
| 65  | ABT 263           | 1.186463 | 0.82 |
| 32  | Midostaurin       | 0.788629 | 0.81 |
| 107 | Alpelisib         | 1.045282 | 0.81 |
| 27  | TL 1 85           | 0.547351 | 0.81 |
| 37  | MPS 1 IN 1        | 0.45299  | 0.81 |
| 74  | VNLG 124          | 0.245858 | 0.81 |
| 9   | GSK1070916        | 1.373304 | 0.81 |
| 82  | X5 Fluorouracil   | 0.877591 | 0.81 |
| 98  | FTI 277           | 0.245601 | 0.81 |
| 96  | CEP 701           | 0.690182 | 0.81 |
| 86  | SB52334           | 0.596348 | 0.81 |
| 60  | LY317615          | 1.139537 | 0.8  |
| 1   | Dabrafenib        | 1.067914 | 0.8  |
| 102 | Lapatinib         | 1.041802 | 0.8  |
| 77  | AV 951            | 0.164947 | 0.8  |
| 90  | Vinblastine       | 0.601047 | 0.8  |
| 16  | AC220             | 0.30892  | 0.8  |
| 62  | Bicalutamide      | 0.157783 | 0.8  |
| 50  | SN 38             | 0.991437 | 0.79 |

|     |                    |          |      |
|-----|--------------------|----------|------|
| 44  | UNC0638 1          | 0.563832 | 0.79 |
| 79  | JQ12               | 1.105395 | 0.79 |
| 22  | SGC0946            | 0.127308 | 0.79 |
| 25  | SB590885           | 0.391449 | 0.79 |
| 57  | FR 180204          | 0.222796 | 0.78 |
| 105 | Palbociclib        | 0.57996  | 0.78 |
| 47  | CCT018159          | 0.513442 | 0.78 |
| 33  | Y 39983            | 0.43126  | 0.78 |
| 78  | NSC 207895         | 0.620491 | 0.77 |
| 56  | ATRA               | 0.50509  | 0.77 |
| 99  | Talazoparib        | 0.693323 | 0.77 |
| 81  | EX 527             | 0.20117  | 0.76 |
| 40  | MP470              | 1.554647 | 0.74 |
| 80  | Temozolomide       | 0.217361 | 0.74 |
| 4   | PLX4720            | 0.578996 | 0.74 |
| 12  | NU 7441            | 0.379083 | 0.74 |
| 2   | ABT 888            | 0.190526 | 0.73 |
| 54  | PD 173074          | 0.599212 | 0.73 |
| 72  | Nutlin 3a          | 0.414614 | 0.72 |
| 71  | CCT007093          | 0.445734 | 0.72 |
| 76  | KIN001 055         | 0.362043 | 0.71 |
| 104 | Olaparib           | 0.534837 | 0.7  |
| 5   | JNK Inhibitor VIII | 0.251564 | 0.7  |
| 106 | Ribociclib         | 0.458063 | 0.7  |
| 101 | Dinaciclib         | 1.32016  | 0.69 |
| 89  | NVP BEZ235         | 0.392105 | 0.69 |
| 87  | Temsirolimus       | 1.001178 | 0.68 |
| 3   | Lenalidomide       | 0.253377 | 0.66 |
| 97  | IOX2               | 0.268317 | 0.66 |
| 103 | Niraparib          | 0.39966  | 0.64 |
| 49  | CH5424802          | 0.703146 | 0.63 |
| 48  | CAL 101            | 0.511713 | 0.63 |
| 21  | JQ1                | 0.288629 | 0.61 |
| 0   | Tamoxifen          | 0.565824 | 0.58 |

**Table S4.** Performance of classification of drugs as sensitive or resistant.

| Sl no | Drugs               | FPR      | Accuracy  | Sensitivity | Specificity |
|-------|---------------------|----------|-----------|-------------|-------------|
| 0     | Dabrafenib          | 0.52381  | 0.6190476 | 0.76190476  | 0.47619048  |
| 1     | Veliparib           | 0.333333 | 0.7619048 | 0.85714286  | 0.66666667  |
| 2     | PLX4720             | 0.285714 | 0.7380952 | 0.76190476  | 0.71428571  |
| 3     | VX_11e              | 0.333333 | 0.7619048 | 0.85714286  | 0.66666667  |
| 4     | Epothilone_B        | 0.095238 | 0.8571429 | 0.80952381  | 0.9047619   |
| 5     | PLX4720__rescreen__ | 0.428571 | 0.6428571 | 0.71428571  | 0.57142857  |
| 6     | GSK1070916          | 0.380952 | 0.7619048 | 0.9047619   | 0.61904762  |
| 7     | Omipalisib          | 0.095238 | 0.8571429 | 0.80952381  | 0.9047619   |
| 8     | QL_X_138            | 0.333333 | 0.7380952 | 0.80952381  | 0.66666667  |
| 9     | Mitomycin_C         | 0.047619 | 0.8571429 | 0.76190476  | 0.95238095  |
| 10    | WZ3105              | 0.095238 | 0.7619048 | 0.61904762  | 0.9047619   |
| 11    | CP724714            | 0.238095 | 0.8333333 | 0.9047619   | 0.76190476  |
| 12    | Quizartinib         | 0.333333 | 0.7857143 | 0.9047619   | 0.66666667  |
| 13    | Tipifarnib          | 0.238095 | 0.7380952 | 0.71428571  | 0.76190476  |
| 14    | SNX_2112            | 0.095238 | 0.9047619 | 0.9047619   | 0.9047619   |
| 15    | PI_103              | 0.142857 | 0.7857143 | 0.71428571  | 0.85714286  |
| 16    | Dacinostat          | 0.047619 | 0.8333333 | 0.71428571  | 0.95238095  |
| 17    | SGC0946             | 0.333333 | 0.7857143 | 0.9047619   | 0.66666667  |
| 18    | GSK429286A          | 0.238095 | 0.8333333 | 0.9047619   | 0.76190476  |
| 19    | AS605240            | 0.142857 | 0.7857143 | 0.71428571  | 0.85714286  |

|    |                    |          |           |            |            |
|----|--------------------|----------|-----------|------------|------------|
| 20 | SB590885           | 0.238095 | 0.8571429 | 0.95238095 | 0.76190476 |
| 21 | Ispinesib Mesylate | 0.190476 | 0.8571429 | 0.9047619  | 0.80952381 |
| 22 | TL_1_85            | 0.285714 | 0.7619048 | 0.80952381 | 0.71428571 |
| 23 | Ruxolitinib        | 0.285714 | 0.7380952 | 0.76190476 | 0.71428571 |
| 24 | OSI_027            | 0.095238 | 0.9047619 | 0.9047619  | 0.9047619  |
| 25 | AKT inhibitor VIII | 0.238095 | 0.8333333 | 0.9047619  | 0.76190476 |
| 26 | I_BET              | 0.142857 | 0.8333333 | 0.80952381 | 0.85714286 |
| 27 | Midostaurin        | 0.142857 | 0.8809524 | 0.9047619  | 0.85714286 |
| 28 | Y_39983            | 0.333333 | 0.7380952 | 0.80952381 | 0.66666667 |
| 29 | HG_6_64_1          | 0.047619 | 0.9047619 | 0.85714286 | 0.95238095 |
| 30 | PIK_93             | 0.095238 | 0.8571429 | 0.80952381 | 0.9047619  |
| 31 | JW_7_24_1          | 0.047619 | 0.9047619 | 0.85714286 | 0.95238095 |
| 32 | MPS_1_IN_1         | 0.285714 | 0.7619048 | 0.80952381 | 0.71428571 |
| 33 | BX_795             | 0.190476 | 0.8809524 | 0.95238095 | 0.80952381 |
| 34 | STF_62247          | 0.285714 | 0.7857143 | 0.85714286 | 0.71428571 |
| 35 | CX_5461            | 0.333333 | 0.7857143 | 0.9047619  | 0.66666667 |
| 36 | CAY10603           | 0.142857 | 0.6904762 | 0.52380952 | 0.85714286 |
| 37 | Foretinib          | 0.142857 | 0.7619048 | 0.66666667 | 0.85714286 |
| 38 | UNC0638_1          | 0.285714 | 0.7380952 | 0.76190476 | 0.71428571 |
| 39 | CUDC_101           | 0.095238 | 0.7380952 | 0.57142857 | 0.9047619  |
| 40 | Docetaxel          | 0.047619 | 0.7380952 | 0.52380952 | 0.95238095 |
| 41 | CCT018159          | 0.238095 | 0.7142857 | 0.66666667 | 0.76190476 |
| 42 | SN_38              | 0.190476 | 0.7857143 | 0.76190476 | 0.80952381 |
| 43 | NPK76_II_72_1      | 0.142857 | 0.7857143 | 0.71428571 | 0.85714286 |
| 44 | Refametinib        | 0.285714 | 0.7380952 | 0.76190476 | 0.71428571 |
| 45 | XMD14_99           | 0.333333 | 0.7380952 | 0.80952381 | 0.66666667 |
| 46 | Afatinib           | 0.380952 | 0.7619048 | 0.9047619  | 0.61904762 |
| 47 | Tretinoin          | 0.47619  | 0.7380952 | 0.95238095 | 0.52380952 |
| 48 | FR_180204          | 0.285714 | 0.8095238 | 0.9047619  | 0.71428571 |
| 49 | Daporinad          | 0.190476 | 0.9047619 | 1          | 0.80952381 |
| 50 | Gemcitabine        | 0        | 0.952381  | 0.9047619  | 1          |
| 51 | Enzastaurin        | 0.095238 | 0.8333333 | 0.76190476 | 0.9047619  |
| 52 | JQ1_1              | 0.238095 | 0.7857143 | 0.80952381 | 0.76190476 |
| 53 | Bicalutamide       | 0.095238 | 0.8809524 | 0.85714286 | 0.9047619  |
| 54 | TPCA_1             | 0.190476 | 0.8095238 | 0.80952381 | 0.80952381 |
| 55 | Bleomycin          | 0.142857 | 0.9047619 | 0.95238095 | 0.85714286 |
| 56 | Navitoclax         | 0.238095 | 0.7142857 | 0.66666667 | 0.76190476 |
| 57 | Thapsigargin       | 0        | 0.8809524 | 0.76190476 | 1          |
| 58 | AZD7762            | 0.238095 | 0.7619048 | 0.76190476 | 0.76190476 |
| 59 | Genentech_Cpd_10   | 0.190476 | 0.7380952 | 0.66666667 | 0.80952381 |
| 60 | BMS_345541         | 0.095238 | 0.8571429 | 0.80952381 | 0.9047619  |
| 61 | Masitinib          | 0.047619 | 0.8095238 | 0.66666667 | 0.95238095 |
| 62 | Trametinib         | 0.238095 | 0.8095238 | 0.85714286 | 0.76190476 |
| 63 | VNLG_124           | 0.190476 | 0.8571429 | 0.9047619  | 0.80952381 |
| 64 | UNC1215            | 0.238095 | 0.8095238 | 0.85714286 | 0.76190476 |
| 65 | Tivozanib          | 0.238095 | 0.7857143 | 0.80952381 | 0.76190476 |
| 66 | NSC_207895         | 0.190476 | 0.8095238 | 0.80952381 | 0.80952381 |
| 67 | JQ12               | 0.095238 | 0.8333333 | 0.76190476 | 0.9047619  |
| 68 | X5_Fluorouracil    | 0.190476 | 0.8095238 | 0.80952381 | 0.80952381 |
| 69 | PHA_793887         | 0.190476 | 0.8809524 | 0.95238095 | 0.80952381 |
| 70 | KIN001_244         | 0        | 0.9047619 | 0.80952381 | 1          |
| 71 | Luminespib         | 0.142857 | 0.7619048 | 0.66666667 | 0.85714286 |
| 72 | SB52334            | 0.333333 | 0.7380952 | 0.80952381 | 0.66666667 |
| 73 | ZSTK474            | 0.142857 | 0.8571429 | 0.85714286 | 0.85714286 |
| 74 | Vinblastine        | 0.142857 | 0.8809524 | 0.9047619  | 0.85714286 |
| 75 | YM201636           | 0.047619 | 0.8809524 | 0.80952381 | 0.95238095 |



|    |              |          |           |            |            |
|----|--------------|----------|-----------|------------|------------|
| 76 | YK_4_279     | 0.142857 | 0.7619048 | 0.66666667 | 0.85714286 |
| 77 | KIN001_266   | 0.047619 | 0.7142857 | 0.47619048 | 0.95238095 |
| 78 | GSK690693    | 0.142857 | 0.8333333 | 0.80952381 | 0.85714286 |
| 79 | Belinostat   | 0.095238 | 0.7857143 | 0.66666667 | 0.9047619  |
| 80 | Lestaurtinib | 0.238095 | 0.7380952 | 0.71428571 | 0.76190476 |
| 81 | FTI_277      | 0.142857 | 0.8095238 | 0.76190476 | 0.85714286 |
| 82 | Talazoparib  | 0.210526 | 0.6904762 | 0.60869565 | 0.78947368 |
| 83 | Lapatinib    | 0.238095 | 0.6904762 | 0.61904762 | 0.76190476 |
| 84 | Olaparib     | 0.2      | 0.6190476 | 0.45454545 | 0.8        |
| 85 | Palbociclib  | 0.142857 | 0.7380952 | 0.61904762 | 0.85714286 |
| 86 | Alpelisib    | 0.25     | 0.7142857 | 0.68181818 | 0.75       |

**Table S5.** Predicted drugs for Luminal and Her2 subtypes.

| <b>Luminal</b> | <b>Her2+</b> |
|----------------|--------------|
| Lapatinib      | Lapatinib    |
| NU_7441        | Palbociclib  |
| WZ3105         | NU_7441      |
| Quizartinib    | WZ3105       |
| Dacinostat     | CP724714     |
| SGC0946        | Quizartinib  |
| OSI_027        | Tipifarnib   |
| STF_62247      | Dacinostat   |
| MP470          | SGC0946      |
| CCT018159      | GSK429286A   |
| Afatinib       | OSI_027      |
| Tretinoin      | BX_795       |
| FK866          | STF_62247    |
| JQ1_1          | MP470        |
| Navitoclax     | CCT018159    |
| Tivozanib      | CH5424802    |
| JQ12           | PD_173074    |
| IOX2           | Afatinib     |
|                | Tretinoin    |
|                | FK866        |
|                | JQ1_1        |
|                | Navitoclax   |
|                | UNC1215      |
|                | Tivozanib    |
